# Supplementary material for: Effectiveness of Concomitant Chemoradiotherapy with Gemcitabine in Locally Advanced Cervical Cancer Patients with Comorbidities
Source: PubMed Central journal article supplement — Cancer Res Treat. 2021 Aug 10;54(2):554–62. doi: 10.4143/crt.2021.375 (PMC9016315; doi:10.4143/crt.2021.375), 2021-08-10
Supplement: crt-2021-375S1_Table.pdf [file crt-2021-375S1_Table.pdf]

**S1 Table.** Treatment characteristics of LACC patients

| Type of treatment                | Cisplatin <sup>a)</sup><br>(n=126) | Gemcitabine <sup>b)</sup><br>(n=63) | p-value             |
|----------------------------------|------------------------------------|-------------------------------------|---------------------|
| <b>No. of CT cycles received</b> |                                    |                                     |                     |
| 3 cycles                         | 8 (6.3)                            | 5 (7.9)                             | 0.159 <sup>c)</sup> |
| 4 cycles                         | 31 (24.6)                          | 20 (31.7)                           |                     |
| 5 cycles                         | 48 (38.1)                          | 24 (38.1)                           |                     |
| 6 cycles                         | 38 (30.2)                          | 14 (22.2)                           |                     |
| 7 cycles                         | 1 (0.8)                            | 0 (0)                               |                     |
| <b>RT dosage (Gy)</b>            | 78.7±5.9                           | 79.6±5.3                            | 0.526 <sup>d)</sup> |
| <b>Protraction time (day)</b>    | 75.4±22.1                          | 76.8±21.2                           | 0.384 <sup>d)</sup> |
| <b>Brachytherapy</b>             |                                    |                                     |                     |
| High rate                        | 67 (53.2)                          | 35 (55.6)                           | 0.757 <sup>c)</sup> |
| Low rate                         | 59 (46.8)                          | 28 (44.4)                           |                     |

Values are presented as number (%) or mean±SD. CT, chemotherapy; LACC, locally advanced cervical cancer; RT, radiotherapy; SD, standard deviation. <sup>a)</sup>Cisplatin dose was 40 mg/m<sup>2</sup>, <sup>b)</sup>Gemcitabine dose was 300 mg/m<sup>2</sup>, <sup>c)</sup>Chi-square test, <sup>d)</sup>Student T test for independent samples.
